# Supplementary material for: Identification and Characterization of the Masculinizing Function of the Helicoverpa armigera Masc Gene
Source: MDPI journal article supplement (doi:10.3390/ijms22168650), 2021-08-11
Supplement: s1 [file s1]

**Table S1. Oligos used in this study.**

| Primer name                                              | Sequence (5' to 3')          | Length<br>(bp) | Efficiency<br>(%) | Tm<br>(°C) |
|----------------------------------------------------------|------------------------------|----------------|-------------------|------------|
| Primer for 5'RACE and 3'RACE of <i>HaMasc</i>            |                              |                |                   |            |
| Harm-mascF2                                              | CCTGTTTGGCTTGATTTGAATACCAAG  | 1966           |                   | 60         |
| Harm-mascR2                                              | CTCGTCAGATTTATTGGAATGGGGGA   |                |                   |            |
| Hamasc5'GSP1                                             | CGTGGGTCTGTTGGAGCTACTGATGG   |                |                   | 60         |
| Hamasc5'GSP2                                             | CAAAGGCGGCTGACGGCCATTTTGC    |                |                   | 58         |
| Hamasc3'GSP1                                             | TCAGCCGCATCACTATCCCCCATTC    |                |                   | 60         |
| Hamasc3'GSP2                                             | GTGGGTGTAACCTCAAGCACCTTCGCG  |                |                   | 60         |
| Primer for <i>HaMasc</i> DNA and cDNA RT-PCR and RT-qPCR |                              |                |                   |            |
| β-ACT-F                                                  | CCTGGTATTGCTGACCGTATGC       | 144            | 97.87             | 60         |
| β-ACT-R                                                  | CTGTTGGAAGGTGGAGAGGGAA       |                |                   |            |
| EF-F                                                     | GAAGTCAAGTCCGTGGAGATG        | 171            | 95.15             | 60         |
| EF-R                                                     | GACCTGTGCTGTGAAGTCG          |                |                   |            |
| qRT-mascF2                                               | AGGTCCAATCCTGTCACTCATTC      | 254(DNA)       | 102.01            | 60         |
| qRT-mascR2                                               | CTGTTGTTTACGTTACTAGTGCTCG    | 169(cDNA)      |                   |            |
| Semi-mascF2                                              | ACCGTGCCGAAACAGTTCCTACT      | 397            |                   | 58         |
| Semi-mascR2                                              | GTGCTCGGGTATCTGCTGGCACT      |                |                   |            |
| Ha-DX-exo2F                                              | GGTGCTCGTGATCCTCAACTATG      | 419/668/683    |                   | 60         |
| Ha-DX-exo6R                                              | CTTAACAGATCTAGCACTAGGTGTCCTG | /797/812       |                   |            |
| Hamasc-1220F                                             | AGTTGGAGTGCGAGAGGGAATATCA    |                |                   | 60         |
| Hamasc-1352R                                             | GGAAGTGTTCGGCACGGTAGATGTA    |                |                   |            |
| qRT-masc1F                                               | ACATAGTTTGCTGCGGTAAGTTTAC    | 165            | 91.22             | 60         |
| qRT-masc1/2R                                             | CTACTGATGGTGCCGACTGTTGC      |                |                   |            |
| qRT-masc2F                                               | ACATAGTTTGCTGCGTTCATGAGTAA   | 85             | 90.64             | 60         |
| qRT-masc1/2R                                             | CTACTGATGGTGCCGACTGTTGC      |                |                   |            |

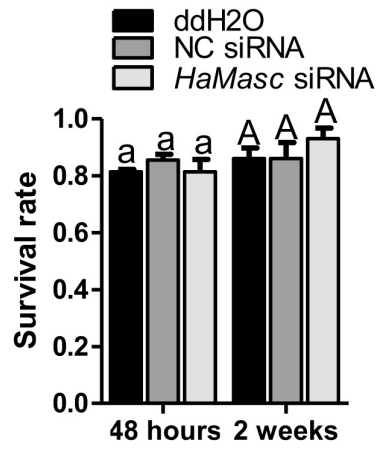

**Figure S1.** Impacts of *HaMasc* siRNA mixture on *H. armigera* larvae survival. ddH<sub>2</sub>O, NC siRNA, *HaMasc* siRNA was different treat group. Bars with different letters are significantly different ( $P < 0.05$ , One-way ANOVA followed by Tukey's HSD test).

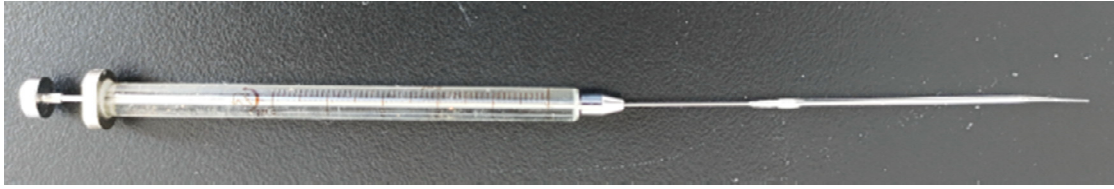

**Figure S2** siRNA injection equipment is composed of (A) a capillary glass needle and (B) a 5  $\mu$ L syringe.
